# Supplementary material for: Nanobioparticle-prepared biochar enhanced Fenton oxidation for treatment of saline organic wastewater
Source: Royal Society of Chemistry journal article supplement (doi:10.1039/d4ew00760c), 2024-12-30
Supplement: d4ew00760c1.pdf [file d4ew00760c1.pdf]

## Supporting Information

### **Nanobioparticle-Prepared Biochar Enhanced Fenton Oxidation for Treatment of Saline Organic Wastewater**

Shanhong Lan<sup>\*a</sup>, Shiwen Geng<sup>b</sup>, Yuqi Jin<sup>c</sup>, Hui Zhang<sup>c</sup>, Xun Liu<sup>c</sup>, Chenbo Ma<sup>c</sup>,  
Chuankun Li<sup>c</sup>, Xuejie Dong<sup>c</sup>, Qiliang Cao<sup>c</sup>, Ke Li<sup>c</sup>

a. School of Environment and Civil Engineering, Dongguan University of Technology,  
Dongguan, 523808, China;

b. H.B.Fuller (YanTai) Advanced Materials Co., Ltd, Yantai, 264000, China;

c. College of Environment and Safety Engineering, Qingdao University of Science &  
Technology, Qingdao, 266042, China

\*Corresponding author: [llssshhhh@126.com](mailto:llssshhhh@126.com)

**Fig.S1**

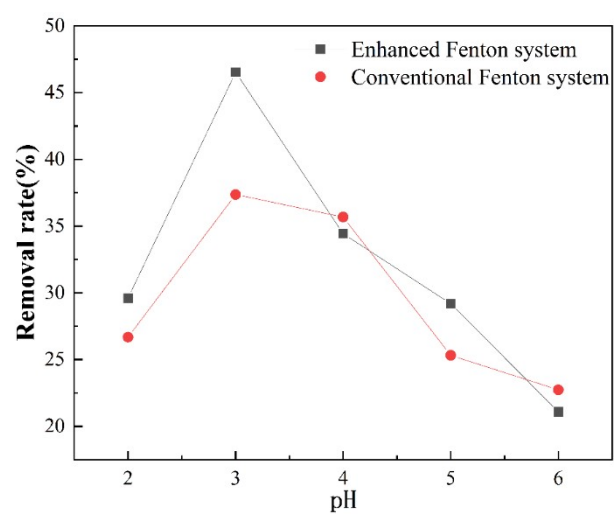

Fig. S1 Influence of pH on COD removal rate
